# Supplementary material
Source: Elsevier journal article supplement (https://www.sciencedirect.com/science/article/pii/S1699258X15000029)
Supplement: mmc1 [file S1699258X15000029:mmc1.pdf]

[illegible]

[illegible]

|                                              |                       |                       |                       |                       |                       |                       |                       |                       |                       |                       |                       |
|----------------------------------------------|-----------------------|-----------------------|-----------------------|-----------------------|-----------------------|-----------------------|-----------------------|-----------------------|-----------------------|-----------------------|-----------------------|
| Estadio de la patología                      | <input type="radio"/> |
| Forma física del paciente                    | <input type="radio"/> |
| Distribución corporal                        | <input type="radio"/> |
| Articulaciones afectadas                     | <input type="radio"/> |
| Índice de masa corporal                      | <input type="radio"/> |
| Experiencia previa del paciente <sup>2</sup> | <input type="radio"/> |
| Preferencias paciente <sup>3</sup>           | <input type="radio"/> |
| Accesibilidad                                | <input type="radio"/> |

<sup>1</sup>Inflamatoria o mecánica; <sup>2</sup>Experiencia previa con el ejercicio; <sup>3</sup>Preferencias del paciente sobre tipo de ejercicio

**A.2.3. Valore, de 0 a 10, la importancia terapéutica de los siguientes ejercicios en las distintas patologías**

|                             | Aeróbico             | Estiramiento         | Fortalecimiento      | Activo-asistido      |
|-----------------------------|----------------------|----------------------|----------------------|----------------------|
| Artrosis de rodilla         | <input type="text"/> | <input type="text"/> | <input type="text"/> | <input type="text"/> |
| Fibromialgia                | <input type="text"/> | <input type="text"/> | <input type="text"/> | <input type="text"/> |
| Artritis reumatoide         | <input type="text"/> | <input type="text"/> | <input type="text"/> | <input type="text"/> |
| Espondiloartritis           | <input type="text"/> | <input type="text"/> | <input type="text"/> | <input type="text"/> |
| Osteoporosis                | <input type="text"/> | <input type="text"/> | <input type="text"/> | <input type="text"/> |
| Patología de partes blandas | <input type="text"/> | <input type="text"/> | <input type="text"/> | <input type="text"/> |

**A.2.4. ¿En qué tipo de patología reumática se obtienen mayores beneficios con el ejercicio?**

|                               |                       |
|-------------------------------|-----------------------|
| Inflamatoria periférica       | <input type="radio"/> |
| Inflamatoria axial            | <input type="radio"/> |
| Artrosis de cadera            | <input type="radio"/> |
| Artrosis de rodilla           | <input type="radio"/> |
| Osteoporosis                  | <input type="radio"/> |
| Reumatismos de partes blandas | <input type="radio"/> |

**A.2.5. ¿Cuáles son los efectos de los ejercicios de estiramiento?**

|                                           |                       |
|-------------------------------------------|-----------------------|
| Estirar el músculo y aumentar su longitud | <input type="radio"/> |
| Modificar la movilidad articular          | <input type="radio"/> |
| Aumentar la potencia muscular             | <input type="radio"/> |

## C

[illegible]

[illegible]



[illegible]

**B.6. Valore la indicación de los siguientes tratamientos según la FASE de la enfermedad desde 0 (contraindicado) a 10 (indicación fundamental)**

| Tipo de ejercicio                        | Fase inicial             | Fase intermedia          | Fase avanzada            |
|------------------------------------------|--------------------------|--------------------------|--------------------------|
| Aeróbico                                 | <input type="checkbox"/> | <input type="checkbox"/> | <input type="checkbox"/> |
| Estiramiento                             | <input type="checkbox"/> | <input type="checkbox"/> | <input type="checkbox"/> |
| Fortalecimiento                          | <input type="checkbox"/> | <input type="checkbox"/> | <input type="checkbox"/> |
| Reeducación postural global              | <input type="checkbox"/> | <input type="checkbox"/> | <input type="checkbox"/> |
| Medios físicos (TENS, termoterapia, etc) | <input type="checkbox"/> | <input type="checkbox"/> | <input type="checkbox"/> |
| Manipulación vertebral                   | <input type="checkbox"/> | <input type="checkbox"/> | <input type="checkbox"/> |
| Balneoterapia                            | <input type="checkbox"/> | <input type="checkbox"/> | <input type="checkbox"/> |
| Terapia ocupacional                      | <input type="checkbox"/> | <input type="checkbox"/> | <input type="checkbox"/> |
| Ejercicios respiratorios                 | <input type="checkbox"/> | <input type="checkbox"/> | <input type="checkbox"/> |
| Propioceptivos                           | <input type="checkbox"/> | <input type="checkbox"/> | <input type="checkbox"/> |
| Posturales                               | <input type="checkbox"/> | <input type="checkbox"/> | <input type="checkbox"/> |

**C. Características del encuestado**

Responda, por favor, las siguientes preguntas sobre sus características personales y profesionales.

**C.1. ¿Qué edad tiene?**

**C.2. Sexo**

Hombre

☐

Mujer

☐

**C.3. Valore de 0 (ninguna) a 10 (muy estrecha) su relación con los especialistas en ejercicio (rehabilitadores y fisioterapeutas) de su hospital**

|                       |                       |                       |                       |                       |                       |                       |                       |                       |                       |                       |
|-----------------------|-----------------------|-----------------------|-----------------------|-----------------------|-----------------------|-----------------------|-----------------------|-----------------------|-----------------------|-----------------------|
| 0                     | 1                     | 2                     | 3                     | 4                     | 5                     | 6                     | 7                     | 8                     | 9                     | 10                    |
| <input type="radio"/> |

**C.4. Número de años de ejercicio profesional (incluyendo periodo de residencia)**

### C.5. Situación profesional

Residente

☐

Adjunto

☐

Jefe de sección

☐

Jefe de servicio

☐

### C.6. Indique el número promedio de pacientes nuevos y revisiones que ve a la semana

Pacientes nuevos

Revisiones

### C.7. ¿Cómo definiría su experiencia personal con el ejercicio?

Buena

☐

Regular

☐

Mala

☐

Ninguna

☐

### C.8. ¿Qué tipo de ejercicio realiza habitualmente?

Aeróbico

☐

Fortalecimiento

☐

Combinado

☐

No realizo ejercicio de forma habitual

☐

### C.9. ¿Cuánto tiempo dedica por semana, por término medio, a la práctica de ejercicio físico?

Nada

☐

Menos de 1 hora

☐

Entre 1 y 3 horas

☐

Entre 3 y 6 horas

☐

Más de 6 horas

☐
